# Supplementary material for: Cholesterol, Amyloid Beta, Fructose, and LPS Influence ROS and ATP Concentrations and the Phagocytic Capacity of HMC3 Human Microglia Cell Line
Source: MDPI journal article supplement (doi:10.3390/ijms241210396), 2023-06-20
Supplement: s1 [file s1]

**Cholesterol, amyloid beta, fructose and LPS influence ROS and ATP concentrations and the phagocytic capacity of HMC3 hu-man microglia cell line**

Oscar M. Muñoz Herrera<sup>1</sup>, Brian V. Hong<sup>1</sup>, Ulises Ruiz Mendiola<sup>2</sup>, Izumi Maezawa<sup>2</sup>, Lee-Way Jin<sup>2</sup>, Carlito B. Lebrilla<sup>3</sup>, Danielle J. Harvey<sup>4</sup>, Angela M. Zivkovic<sup>1\*</sup>

<sup>1</sup>Department of Nutrition, UC Davis; <sup>2</sup>Department of Pathology and Laboratory Medicine, UC Davis Medical Center; <sup>3</sup>Department of Chemistry, University of California; <sup>4</sup>Department of Public Health Sciences, UC Davis; Davis, California 95616 United States

\* Correspondence: amzivkovic@ucdavis.edu; Tel.: +1-530-752-3973

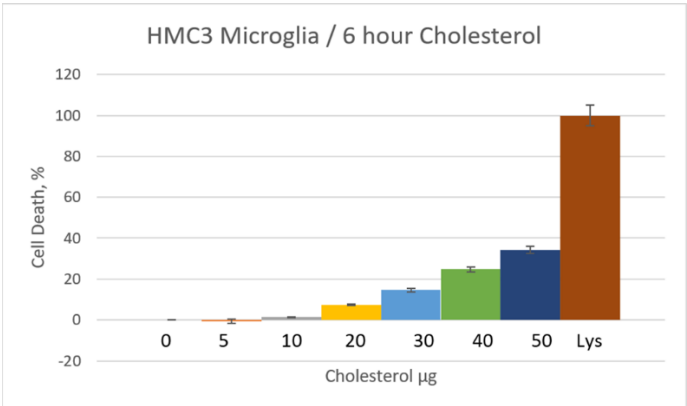

**Supplemental Figure S1. HMC3 Cytotoxicity Assay.** Cholesterol loaded HMC3 microglia (varying doses), for 6 hours.

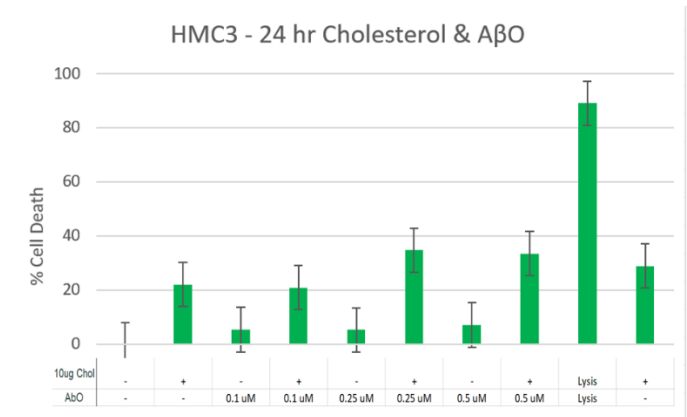

**Supplemental Figure S2. HMC3 Cytotoxicity Assay.** Cholesterol (10µg/mL) loaded and AβO treated HMC3 microglia, for 24 hours.

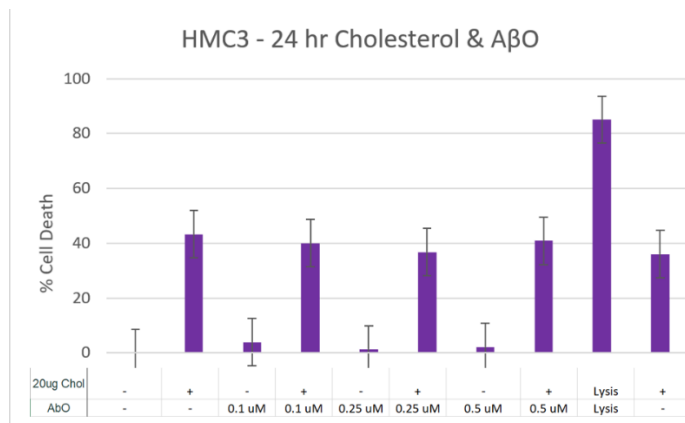

**Supplemental Figure S3.** HMC3 Cytotoxicity Assay. Cholesterol (20 $\mu$ g/mL) loaded and A $\beta$ O treated HMC3 microglia, for 24 hours.

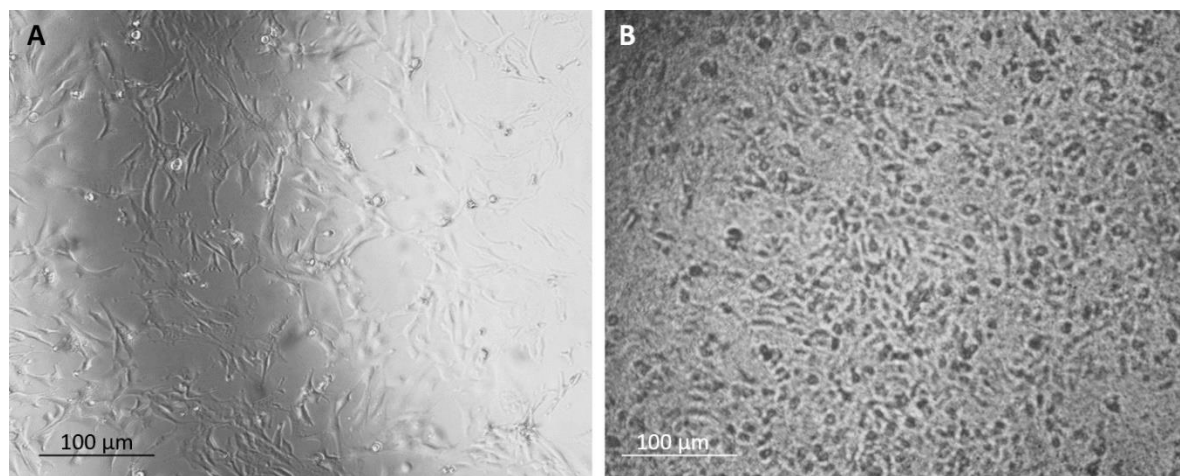

**Supplemental Figure S4. Effects of treatments on HMC3 microglia morphology** A) Untreated HMC3 microglia at timepoint 0 hours, on 96-well plates. n=3, three biological replicates. Digital Microscope Camera was used for the picture. 10x magnification, scale bar 100  $\mu$ m. B) HMC3 microglia following the 24-hour period treatment with A $\beta$ O+Fru+Chol+LPS. n=3, three biological replicates. Digital Microscope Camera was used for the picture. Terms: Lipopolysaccharide (LPS), amyloid beta oligomer (A $\beta$ O), cholesterol (Chol), fructose (Fru). 10x magnification, scale bar 100  $\mu$ m.

**Supplemental Figures S5. Effects of treatments on HMC3 microglia morphology, continued.**

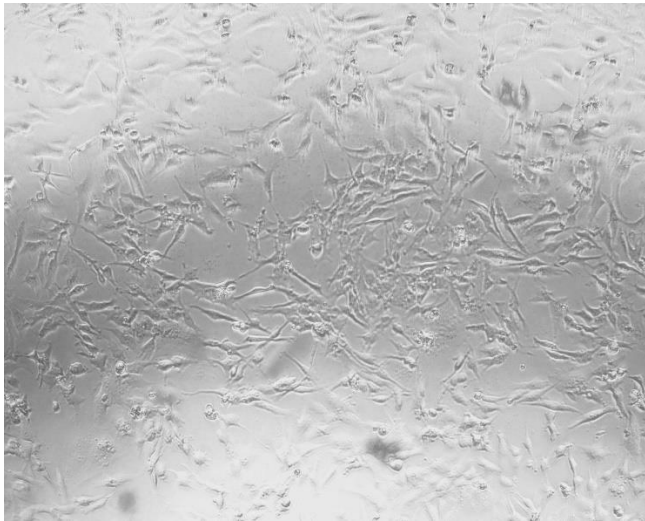

A) HMC3 microglia, at 24 hour time-point, following amyloid-beta oligomer ( $A\beta O$ ) treatment. 10x magnification.

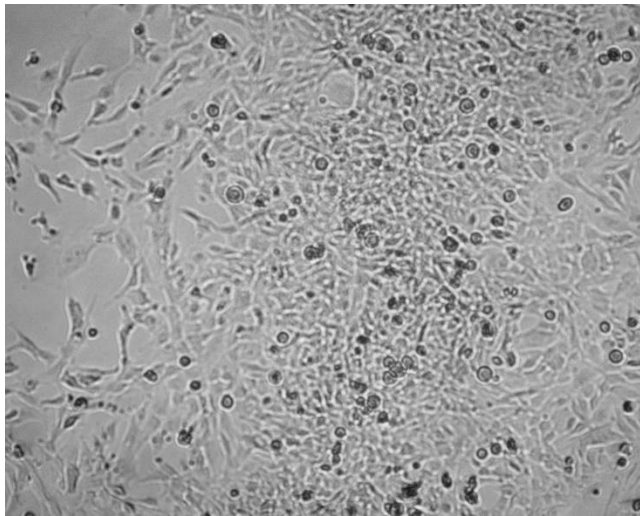

B) HMC3 microglia, at 24 hour time-point, following fructose (Fru) treatment. 10x magnification.

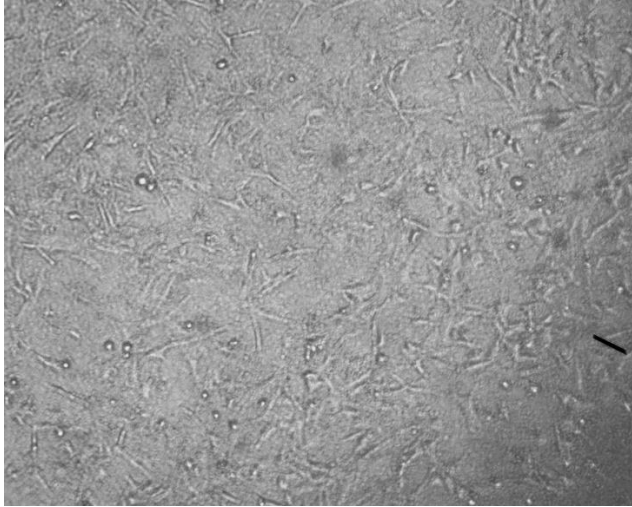

C) HMC3 microglia, at 24 hour time-point, following cholesterol (Chol) treatment. 10x magnification.

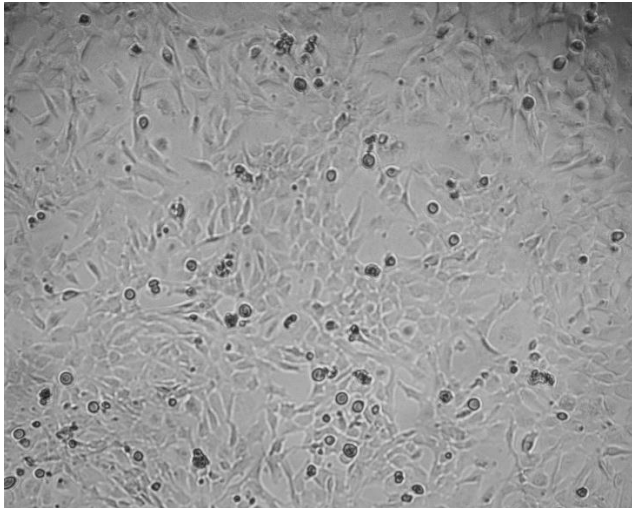

D) HMC3 microglia, at 24 hour time-point, following Lipopolysaccharide (LPS) treatment. 10x magnification.

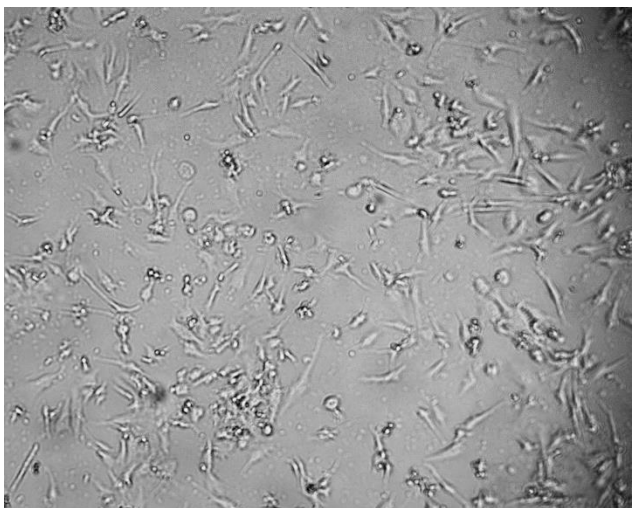

E) HMC3 microglia, at 24 hour time-point, following AβO+Fru treatment. 10x magnification.

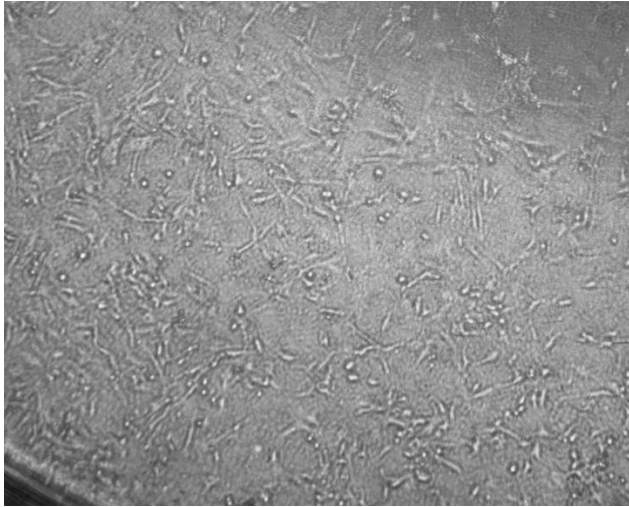

F) HMC3 microglia, at 24 hour time-point, following A $\beta$ O+Chol treatment. 10x magnification.

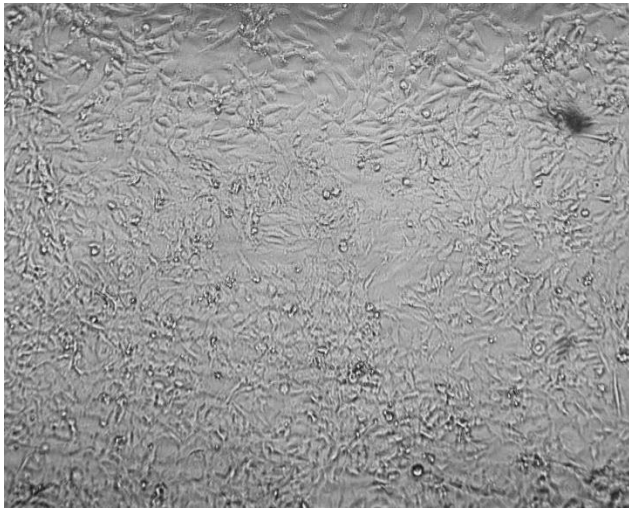

G) HMC3 microglia, at 24 hour time-point, following A $\beta$ O+LPS treatment. 10x magnification.

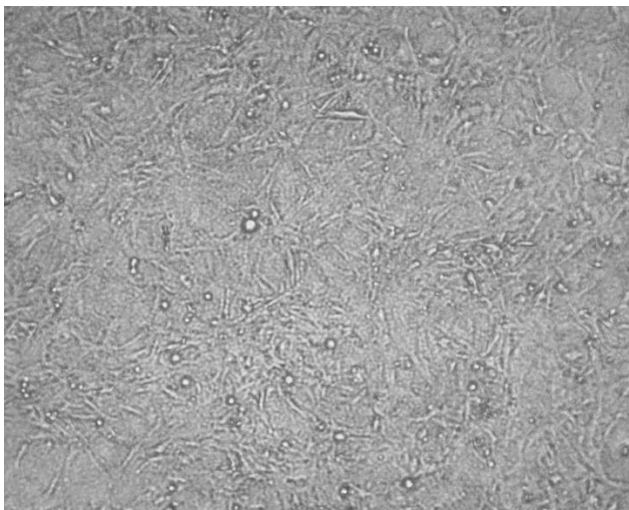

H) HMC3 microglia, at 24 hour time-point, following Fru+Chol treatment. 10x magnification.

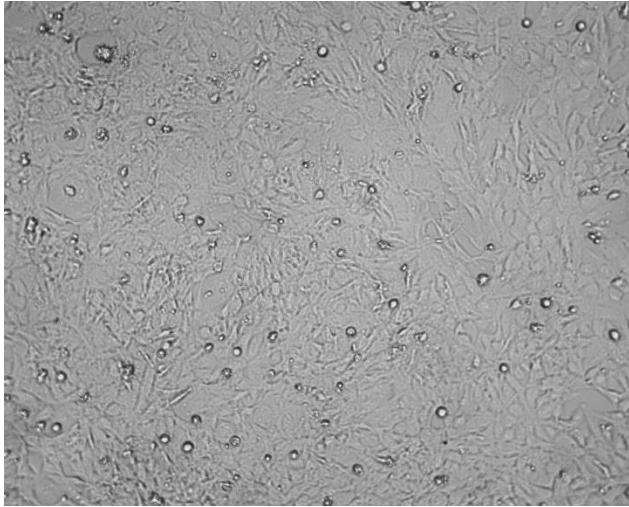

I) HMC3 microglia, at 24 hour time-point, following Fru+LPS treatment. 10x magnification.

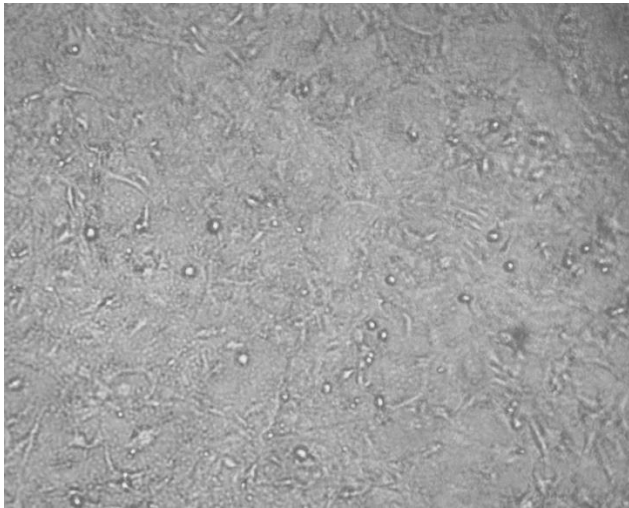

J) HMC3 microglia, at 24 hour time-point, following Chol+LPS treatment. 10x magnification.

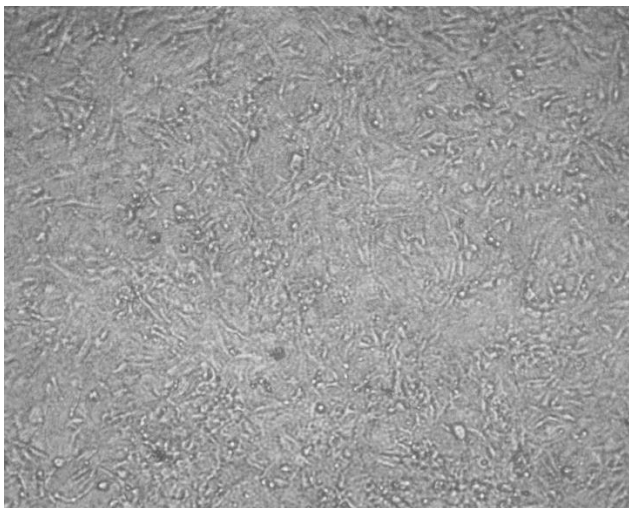

K) HMC3 microglia, at 24 hour time-point, following AβO+Chol+LPS treatment. 10x magnification.

**Table S1. Log2 Fold change of treatment on expression of pro-inflammatory cytokine genes and APOE in HMC3 microglia compared to control.**

| Treatment                   | IL1B  | IL6   | TNFA  | APOE  |
|-----------------------------|-------|-------|-------|-------|
| A $\beta$ O                 | -1.76 | -0.27 | -0.59 | 0.52  |
| Cholesterol                 | -2.40 | 0.01  | 1.00  | -1.43 |
| Fructose                    | -0.72 | -0.11 | -0.54 | 0.94  |
| LPS                         | 2.97  | 3.93  | 3.08  | 0.54  |
| A $\beta$ O_Cholesterol     | -3.19 | -1.29 | 0.62  | 1.39  |
| A $\beta$ O_Fructose        | -1.55 | 0.09  | 0.63  | 1.68  |
| A $\beta$ O_LPS             | 1.49  | 3.61  | 3.39  | 1.46  |
| Cholesterol_LPS             | 1.56  | 5.07  | 3.57  | 0.96  |
| Fructose_Cholesterol        | -1.30 | 0.61  | 0.94  | 1.57  |
| Fructose_LPS                | 2.90  | 3.90  | 2.61  | 0.36  |
| A $\beta$ O_Cholesterol_LPS | -2.87 | 0.87  | 1.76  | 2.51  |
| A $\beta$ O_Fru_Chol_LPS    | -1.78 | 1.46  | 4.14  | 3.32  |

**Table S2. Mean  $\pm$  SD of the effects of treatments on whole-cell total and esterified cholesterol concentrations, mitochondrial total cholesterol concentrations and ApoE secretion in HMC3 microglia.**

| Treatment                   | Total Cholesterol |      | Esterified Cholesterol |      | Mitochondrial Cholesterol |      | ApoE         |        |
|-----------------------------|-------------------|------|------------------------|------|---------------------------|------|--------------|--------|
|                             | Mean ( $\mu$ M)   | SD   | Mean ( $\mu$ M)        | SD   | Mean ( $\mu$ M)           | SD   | Mean (pg/mL) | SD     |
| Control                     | 5.27              | 1.78 | 1.79                   | 0.06 | 7.73                      | 0.33 | 638.28       | 110.96 |
| A $\beta$ O                 | 8.21              | 0.02 | 3.81                   | 0.19 | 9.16                      | 0.02 | 299.93       | 38.96  |
| Cholesterol                 | 8.05              | 0.26 | 3.14                   | 0.24 | 10.45                     | 0.25 | 541.90       | 81.65  |
| Fructose                    | 12.20             | 1.22 | 5.79                   | 1.25 | 10.44                     | 2.04 | 587.79       | 59.47  |
| LPS                         | 6.81              | 0.48 | 3.48                   | 0.42 | 10.51                     | 1.05 | 575.70       | 53.48  |
| A $\beta$ O_Cholesterol     | 8.70              | 0.18 | 3.36                   | 0.04 | 11.50                     | 2.98 | 341.23       | 40.86  |
| A $\beta$ O_Fructose        | 10.14             | 0.26 | 5.76                   | 0.34 | 10.10                     | 0.41 | 330.39       | 158.83 |
| A $\beta$ O_LPS             | 8.55              | 0.03 | 3.87                   | 0.21 | 9.14                      | 0.32 | 348.32       | 93.38  |
| Cholesterol_LPS             | 9.33              | 1.68 | 3.67                   | 0.53 | 11.08                     | 1.00 | 503.94       | 66.78  |
| Fructose_Cholesterol        | 12.45             | 2.01 | 4.34                   | 0.11 | 10.20                     | 0.29 | 441.36       | 70.09  |
| Fructose_LPS                | 10.76             | 0.50 | 5.60                   | 0.81 | 10.93                     | 0.28 | 478.91       | 54.36  |
| A $\beta$ O_Cholesterol_LPS | 11.90             | 0.05 | 5.24                   | 1.06 | 11.04                     | 0.40 | 365.01       | 48.45  |
| A $\beta$ O_Fru_Chol_LPS    | 11.04             | 0.26 | 6.42                   | 0.27 | 14.10                     | 3.36 | 326.21       | 80.64  |



**Table S3. Mean  $\pm$  SD of the effects of treatments on HMC3 microglia ROS and ATP concentrations and phagocytic activity.**

| Treatment                   | ATP                 |      | ROS                        |      | Phagocytosis               |      |
|-----------------------------|---------------------|------|----------------------------|------|----------------------------|------|
|                             | Mean<br>(nmol/well) | SD   | Mean<br>(Log2Fluorescence) | SD   | Mean<br>(Log2Fluorescence) | SD   |
| Control                     | 1.93                | 0.43 | 12.77                      | 0.04 | 12.98                      | 0.62 |
| A $\beta$ O                 | 1.72                | 0.21 | 13.52                      | 0.50 | 10.64                      | 0.24 |
| Cholesterol                 | 1.66                | 0.21 | 13.35                      | 0.46 | 11.89                      | 0.20 |
| Fructose                    | 1.92                | 0.22 | 12.23                      | 0.47 | 11.97                      | 0.13 |
| LPS                         | 2.01                | 0.24 | 12.37                      | 0.61 | 11.68                      | 0.37 |
| A $\beta$ O_Cholesterol     | 1.54                | 0.26 | 13.42                      | 0.44 | 11.89                      | 0.08 |
| A $\beta$ O_Fructose        | 1.60                | 0.17 | 13.30                      | 0.22 | 9.10                       | 0.71 |
| A $\beta$ O_LPS             | 1.70                | 0.31 | 13.26                      | 0.26 | 9.95                       | 0.11 |
| Cholesterol_LPS             | 1.80                | 0.29 | 13.05                      | 0.33 | 13.14                      | 0.37 |
| Fructose_Cholesterol        | 1.68                | 0.17 | 12.21                      | 0.46 | 12.31                      | 0.60 |
| Fructose_LPS                | 1.87                | 0.24 | 12.30                      | 0.43 | 11.51                      | 0.80 |
| A $\beta$ O_Cholesterol_LPS | 1.53                | 0.22 | 13.07                      | 0.24 | 11.97                      | 0.59 |
| A $\beta$ O_Fru_Chol_LPS    | 1.27                | 0.13 | 15.51                      | 0.45 | 10.73                      | 0.67 |
